# Supplementary material
Source: PubMed Central journal article supplement (PMC3867963)
Supplement: cn400036j_si_001.pdf [file cn400036j_si_001.pdf]

# Supporting Information

## Cationic amino acid-based lipids as effective non-viral gene delivery vectors for primary cultured neurons

Yumiko Aoshima, Ryosuke, Hokama, Keitaro Sou, Satya Ranjan Sarker, Kabuto Iida,

Hideki Nakamura, Takafumi Inoue, Shinji Takeoka\*

Department of Life Science and Medical Bioscience, Graduate School of Advanced Science  
and Engineering, Waseda University (TWIns), 2-2 Wakamatsu-cho, Shinjuku-ku, Tokyo  
162-8480, Japan

### Synthesis

**Supporting information Figure S1:** Representative fluorescence images of primary cultured cells stained with anti-MAP-2 antibody and 4',6-diamidino-2-phenylindole (DAPI) for purity evaluation.

◀ **Supporting information Figure S2:** Representative fluorescence images of primary cultured cells stained with calcein-AM and anti-MAP-2 antibody to count live neurons for cytotoxicity assay.

**Supporting information Figure S3:** All data of the transfection efficiency of the outstanding samples in Fig.4.

### ***Synthesis***

Briefly, 1,5-ditetradecyl-L-glutamate (Glu2C<sub>14</sub>) was synthesized by dehydration synthesis between glutamic acid and n-tetradecyl alcohol. The amino group of 4-amino butyric acid was protected by di-*tert*-butyl dicarbonate (Boc anhydride), and then the protected 4-amino butyric acid was coupled with Glu2C<sub>14</sub> in the presence of (benzotriazol-1-yloxy)-tris(dimethylamino)phosphonium hexafluorophosphate (BOP) followed by deprotection with trifluoroacetic acid (TFA) to obtain 1,5-ditetradecyl-*N*-trityl-L-glutamate (NH<sub>2</sub>-(CH<sub>2</sub>)<sub>3</sub>-CO-Glu2C<sub>14</sub>). For the synthesis of the arginine-based lipid, dehydration synthesis was performed with the latter compound and Boc-Arg(Boc)<sub>2</sub>-OH in the presence of BOP to obtain 1,5-ditetradecyl-*N*-butoxycarbonyl-*N*-trityl-*N*-arginyl-L-glutamate (Boc-Arg(Boc)<sub>2</sub>-(CH<sub>2</sub>)<sub>3</sub>-CO-Glu2C<sub>14</sub>). For the synthesis of the lysine-based lipid, dehydration synthesis was performed with the latter compound and Boc-Lys(Boc)-OSu to obtain 1,5-ditetradecyl-*N*-butoxycarbonyl-*N*-trityl-*N*-lysl-L-glutamate (Boc-Lys(Boc)-(CH<sub>2</sub>)<sub>3</sub>-CO-Glu2C<sub>14</sub>). Then, lipids with the TFA ion as the counter ion, Arg (TFA<sup>-</sup>) and Lys (TFA<sup>-</sup>), were deprotected with TFA; lipids with the chloride ion as the counter ion, Arg (Cl<sup>-</sup>) and Lys (Cl<sup>-</sup>), were deprotected with HCl (4 M) in ethyl acetate. Finally, both TFA and HCl were removed under reduced pressure followed by flushing with nitrogen and the lipids were obtained.

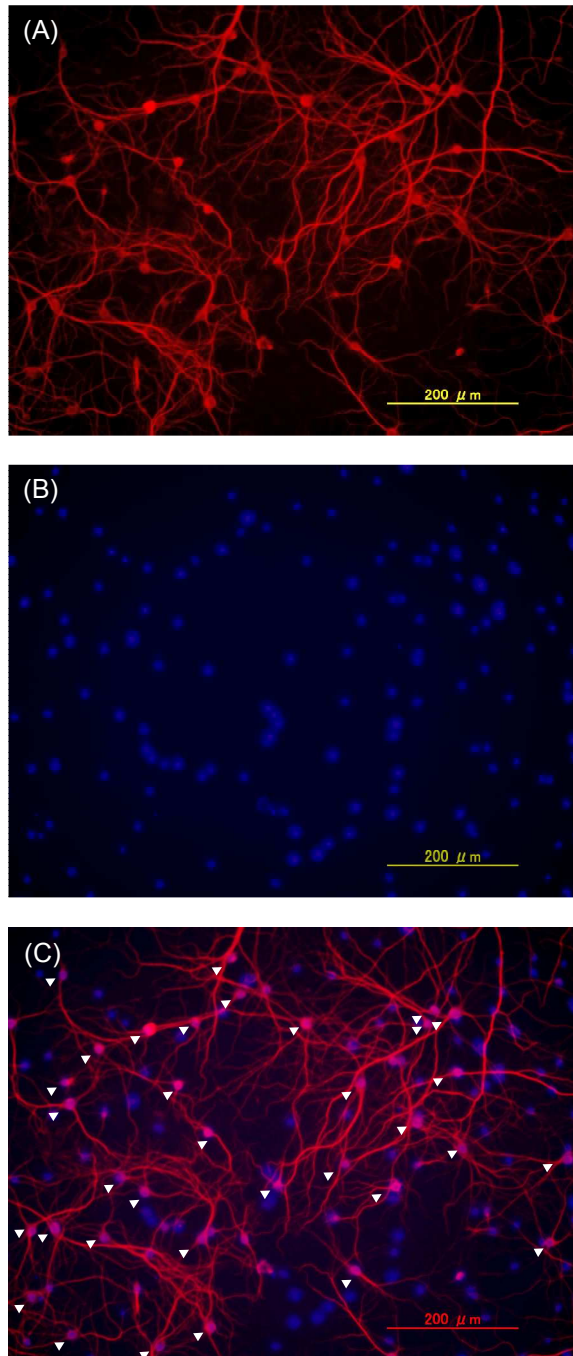

**Supporting information Figure S1:** Representative fluorescence images of primary cultured cells stained with anti-MAP-2 antibody and 4',6-diamidino-2-phenylindole (DAPI) for purity evaluation. Neurons were immunospecifically tagged with anti-MAP-2 antibody (red) and nuclei from all cells are stained with DAPI (blue). (A) Neurons tagged with anti-MAP-2 antibody. (B) Nuclei from all cells stained with DAPI. (C) Merge image of (A) and (B). Arrows indicate the nuclei of neurons.

Percentage of neurons was calculated as follows, Percentage of neurons = (number of nuclei from MAP-2 positive cells) / (total number of nuclei from all cells)  $\times$  100

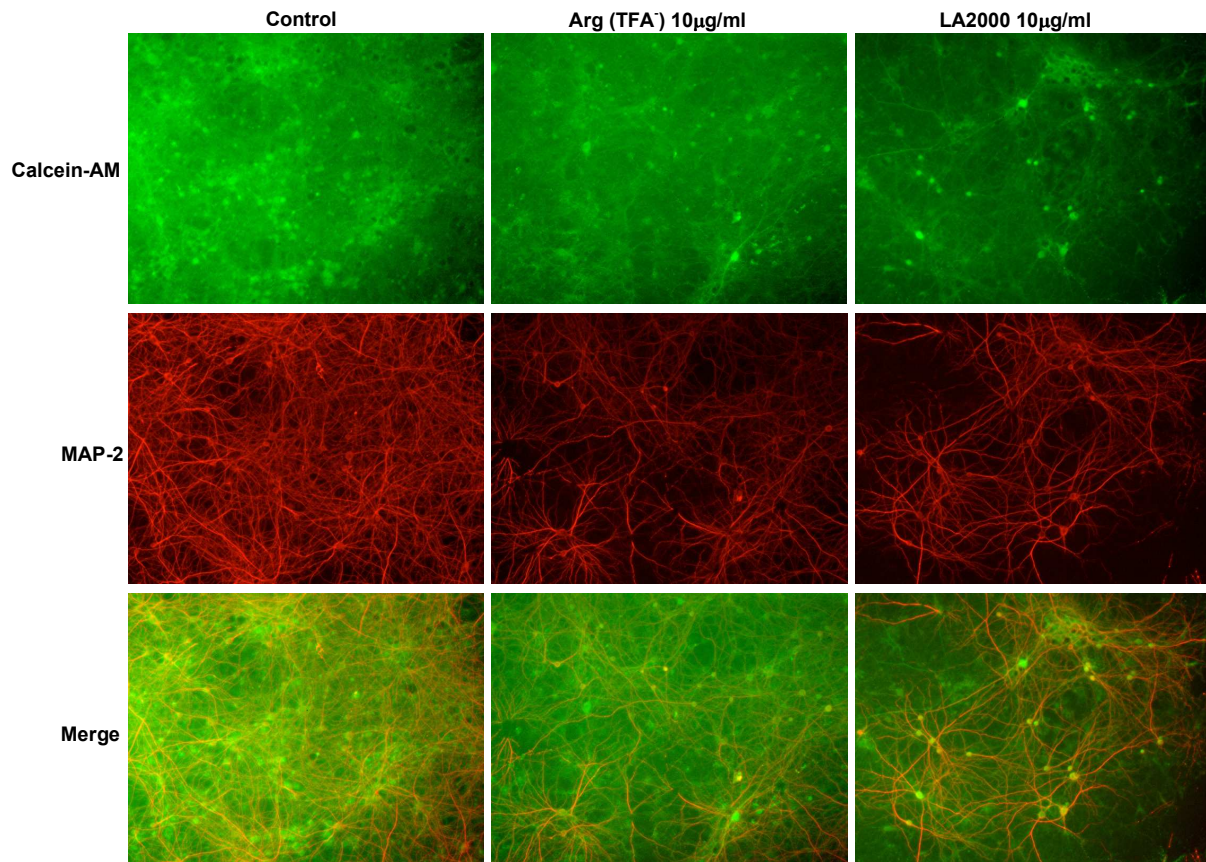

**Supporting information Figure S2:** Representative fluorescence images of primary cultured cells stained with calcein-AM and anti-MAP-2 antibody to count live neurons for cytotoxicity assay. These images were obtained in control which was not exposed to lipids, for Arg (TFA<sup>-</sup>) 10μg/ml which was exposed to Arg (TFA<sup>-</sup>) at 10μg/ml for 48 hours, and LA2000 10μg/ml which was exposed to Lipofectamine<sup>TM</sup> 2000 at 10μg/ml for 48 hours. Live neurons were counted as calcein-AM and MAP-2 positive cells.
